# Supplementary material
Source: PubMed Central journal article supplement (PMC2813324)
Supplement: NIHMS158204-supplement-08.pdf [file NIHMS158204-supplement-08.pdf]

| Table S1. Highly conserved residues |                    |                      |                                         |                       |                                                                                                                                                                                                                    |
|-------------------------------------|--------------------|----------------------|-----------------------------------------|-----------------------|--------------------------------------------------------------------------------------------------------------------------------------------------------------------------------------------------------------------|
| Shared region                       | Structural feature | Residue <sup>a</sup> | BLOSUM62 information score <sup>b</sup> | Sequence identity (%) | Role                                                                                                                                                                                                               |
| β subunit                           |                    |                      |                                         |                       |                                                                                                                                                                                                                    |
| α4                                  | β1                 | G131                 | 0.9829                                  | 96.69                 |                                                                                                                                                                                                                    |
| a8                                  | FL2                | R428                 | 0.9992                                  | 100                   |                                                                                                                                                                                                                    |
|                                     |                    | G446                 | 0.9946                                  | 99.62                 |                                                                                                                                                                                                                    |
|                                     |                    | G450                 | 0.9988                                  | 99.92                 |                                                                                                                                                                                                                    |
| a10                                 |                    | R557                 | 0.9961                                  | 99.85                 | <ul style="list-style-type: none"> <li>• Interacts with substrate γ-phosphate</li> <li>• Participates in E-site nucleotide binding</li> </ul>                                                                      |
|                                     |                    | Q567                 | 0.9953                                  | 99.85                 | <ul style="list-style-type: none"> <li>• Interacts with RNA O3' at the -3 position</li> </ul>                                                                                                                      |
| a11                                 |                    | G669                 | 0.9959                                  | 99.69                 |                                                                                                                                                                                                                    |
|                                     |                    | G681                 | 0.9932                                  | 99.00                 |                                                                                                                                                                                                                    |
|                                     |                    | D686                 | 1                                       | 100                   | <ul style="list-style-type: none"> <li>• Interacts with β'D739/F740/D741 (in β'-NADFDGD motif)</li> <li>• Interacts with βR879</li> <li>• Interacts with substrate γ-phosphate</li> <li>• Chelates MgII</li> </ul> |
|                                     |                    |                      |                                         |                       |                                                                                                                                                                                                                    |
| a12                                 | flap               | G741                 | 0.9948                                  | 99.54                 |                                                                                                                                                                                                                    |

| Shared region | Structural feature | Residue <sup>a</sup> | BLOSUM62 information score <sup>b</sup> | Sequence identity (%) | Role                                                                                                                           |
|---------------|--------------------|----------------------|-----------------------------------------|-----------------------|--------------------------------------------------------------------------------------------------------------------------------|
| a14           |                    | G836                 | 0.9995                                  | 99.92                 |                                                                                                                                |
|               |                    | D837                 | 0.9985                                  | 99.92                 | • Interacts with $\beta$ H999                                                                                                  |
|               |                    | K838                 | 1                                       | 100                   | • Interacts with RNA phosphate backbone at -1 position                                                                         |
|               |                    | K846                 | 0.9990                                  | 99.92                 | • Interacts with RNA phosphate backbone at -1 position<br>• Participates in E-site nucleotide binding                          |
|               |                    | G847                 | 0.9978                                  | 99.85                 |                                                                                                                                |
|               |                    | P859                 | 0.9920                                  | 99.77                 |                                                                                                                                |
|               |                    | G864                 | 0.9985                                  | 99.92                 |                                                                                                                                |
|               |                    | R879                 | 0.99920                                 | 100                   | • Interacts with $\beta$ D686<br>• Interacts with substrate $\gamma$ -phosphate<br>• Participates in E-site nucleotide binding |
|               |                    | E887                 | 0.9852                                  | 99.15                 | • Participates in buried salt-bridge with $\beta$ R842/ $\beta$ H843                                                           |

| Shared region | Structural feature | Residue <sup>a</sup> | BLOSUM62 information score <sup>b</sup> | Sequence identity (%) | Role                                                                      |                              |
|---------------|--------------------|----------------------|-----------------------------------------|-----------------------|---------------------------------------------------------------------------|------------------------------|
| a15           |                    | G990                 | 0.9916                                  | 99.31                 |                                                                           |                              |
|               |                    | L997                 | 1                                       | 100                   |                                                                           |                              |
|               |                    | H999                 | 0.9919                                  | 99.69                 | • Interacts with RNA O2' at -3 position                                   |                              |
|               |                    | K1004                | 0.9963                                  | 99.85                 | • Interacts with RNA O2' at -2 position                                   |                              |
|               |                    | R1008                | 0.9985                                  | 99.92                 |                                                                           |                              |
|               | Sw3                |                      | G1011                                   | 0.9950                | 99.38                                                                     | • lines RNA exit channel     |
|               |                    |                      | Q1019                                   | 0.9932                | 99.92                                                                     |                              |
|               |                    |                      | G1023                                   | 0.9987                | 99.92                                                                     | • lines path of template DNA |
|               |                    |                      | G1028                                   | 1                     | 100                                                                       | • lines path of template DNA |
|               |                    |                      | G1029                                   | 0.99920               | 99.92                                                                     | • lines path of template DNA |
|               |                    | G1033                | 1                                       | 100                   | • Interacts with $\beta$ 'Sw2 region<br>• lines path of template DNA      |                              |
|               |                    | E1034                | 1                                       | 100                   | • Participates in salt bridge with $\beta$ 'R615 (in $\beta$ 'Sw2 region) |                              |
|               |                    | M1035                | 1                                       | 100                   | • Interacts with template DNA at -1 position                              |                              |
|               |                    | E1036                | 1                                       | 100                   |                                                                           |                              |
|               |                    | G1044                | 0.9973                                  | 99.77                 | • Interacts with $\beta$ 'G1475                                           |                              |
|               |                    | L1053                | 0.9851                                  | 97.85                 |                                                                           |                              |
| $\beta$ '     |                    |                      |                                         |                       |                                                                           |                              |
| a3            |                    | C57                  | 0.9924                                  | 99.92                 |                                                                           |                              |
| a8            |                    | R525                 | 0.9956                                  | 99.92                 |                                                                           |                              |

| Shared region | Structural feature | Residue <sup>a</sup> | BLOSUM62 information score <sup>b</sup> | Sequence identity (%) | Role                                                                |                                                                 |
|---------------|--------------------|----------------------|-----------------------------------------|-----------------------|---------------------------------------------------------------------|-----------------------------------------------------------------|
| a11           | Sw2                | K610                 | 0.9992                                  | 100                   | • Interacts with template DNA phosphate backbone at -1/+1 positions |                                                                 |
|               |                    | R615                 | 0.9992                                  | 100                   | • Interacts with template DNA phosphate backbone at +2 position     |                                                                 |
|               |                    | R622                 | 0.9973                                  | 99.83                 | • Interacts with template DNA phosphate backbone at -3 position     |                                                                 |
|               |                    |                      | R628                                    | 1                     | 100                                                                 | • Interacts with template DNA phosphate backbone at -3 position |
|               |                    |                      | V630                                    | 0.9965                | 99.83                                                               |                                                                 |
|               |                    |                      | P645                                    | 0.9984                | 99.92                                                               |                                                                 |
|               |                    |                      | L652                                    | 0.9892                | 97.31                                                               |                                                                 |

| Shared region | Structural feature | Residue <sup>a</sup> | BLOSUM62 information score <sup>b</sup> | Sequence identity (%) | Role                                                                                                                                                                                                                           |
|---------------|--------------------|----------------------|-----------------------------------------|-----------------------|--------------------------------------------------------------------------------------------------------------------------------------------------------------------------------------------------------------------------------|
| a12           | NADFDGD motif      | R704                 | 1                                       | 100                   | <ul style="list-style-type: none"> <li>• Interacts with <math>\beta</math>'N737/A738/D743 of <math>\beta</math>'-NADFDGD motif</li> <li>• Interacts with RNA O2' at -1 position</li> <li>• Interacts with substrate</li> </ul> |
|               |                    | P706                 | 1                                       | 100                   |                                                                                                                                                                                                                                |
|               |                    | L708                 | 1                                       | 100                   | • Interacts with $\beta$ 'T1234 in the TL                                                                                                                                                                                      |
|               |                    | H709                 | 0.9934                                  | 99.83                 |                                                                                                                                                                                                                                |
|               |                    | N737                 | 1                                       | 100                   | • Interacts with substrate O2'/O3'                                                                                                                                                                                             |
|               |                    | A738                 | 0.9881                                  | 98.82                 |                                                                                                                                                                                                                                |
|               |                    | D739                 | 1                                       | 100                   | <ul style="list-style-type: none"> <li>• Interacts with <math>\beta</math>D686</li> <li>• Chelates MgI/MgII</li> </ul>                                                                                                         |
|               |                    | F740                 | 0.9937                                  | 99.75                 | <ul style="list-style-type: none"> <li>• Interacts with <math>\beta</math>D686</li> <li>• Participates in hydrophobic core behind active site</li> </ul>                                                                       |
|               |                    | D741                 | 1                                       | 100                   | <ul style="list-style-type: none"> <li>• Interacts with <math>\beta</math>D686</li> <li>• Chelates MgI</li> <li>• Interacts with RNA at -1 position</li> </ul>                                                                 |
|               |                    | G742                 | 1                                       | 100                   |                                                                                                                                                                                                                                |
|               |                    | D743                 | 1                                       | 100                   | <ul style="list-style-type: none"> <li>• Chelates MgI</li> <li>• Interacts with RNA at -1 position</li> </ul>                                                                                                                  |
|               |                    | E758                 | 1                                       | 100                   |                                                                                                                                                                                                                                |
|               |                    | D784                 | 0.9931                                  | 99.58                 |                                                                                                                                                                                                                                |

| Shared region | Structural feature | Residue <sup>a</sup> | BLOSUM62 information score <sup>b</sup> | Sequence identity (%) | Role                                                                                          |
|---------------|--------------------|----------------------|-----------------------------------------|-----------------------|-----------------------------------------------------------------------------------------------|
| a15           |                    | G1027                | 0.9907                                  | 99.07                 |                                                                                               |
|               |                    | G1043                | 0.9946                                  | 99.49                 |                                                                                               |
|               |                    | G1064                | 0.9970                                  | 99.92                 |                                                                                               |
|               | Bridge helix       | R1078                | 0.9952                                  | 99.74                 | • Interacts with $\beta$ R428                                                                 |
|               |                    | G1080                | 0.9811                                  | 96.46                 | • Interacts with $\beta$ 'F1241 of the TL                                                     |
|               |                    | D1083                | 0.9813                                  | 98.65                 |                                                                                               |
|               |                    | T1088                | 0.9986                                  | 99.92                 | • Interacts with template DNA at the +1 position<br>• Interacts with $\beta$ 'T1234 of the TL |
|               |                    | G1092                | 1                                       | 100                   | • Gly required at this position to make room for the template DNA                             |
|               |                    | R1096                | 0.9992                                  | 100                   | • Interacts with the template DNA phosphate backbone at the +2 position                       |
| a16           | TL helix1          | G1222                | 1                                       | 100                   |                                                                                               |
|               |                    | T1234                | 1                                       | 100                   | • Interacts with $\beta$ 'L708<br>• Interacts with $\beta$ 'T1088 of the bridge helix         |
|               |                    | Q1235                | 1                                       | 100                   |                                                                                               |
|               | TL                 | F1241                | 0.9977                                  | 99.83                 |                                                                                               |
|               |                    | H1242                | 1                                       | 100                   | • Interacts with substrate phosphates                                                         |
| a20           |                    | L1447                | 0.9847                                  | 98.40                 |                                                                                               |
|               |                    | G1475                | 0.9931                                  | 99.41                 | • Interacts with $\beta$ G1044                                                                |

<sup>a</sup> According to *Thermus* RNAP sequence numbering.

<sup>b</sup> As calculated using the program PFAAT {Caffrey, 2007 #1608}

**Table S2. Switch regions<sup>1</sup>.**

| Switch | Subunit  |          | Residues           |                     | Mean<br>Blosum62<br>information<br>score | Absolutely<br>conserved<br>residues       |
|--------|----------|----------|--------------------|---------------------|------------------------------------------|-------------------------------------------|
|        | eRNAP II | bRNAP    | <i>Sce</i> RNAP II | <i>Thermus</i> RNAP |                                          |                                           |
| 1      | Rpb1     | $\beta'$ | 1384-1406          | 1384 – (not shared) | -                                        | -                                         |
| 2      | Rpb1     | $\beta'$ | 328-246            | 606 - 624           | 0.85                                     | K610<br>R615<br>R622                      |
| 3      | Rpb2     | $\beta$  | 1107-1129          | 1010-1031           | 0.81                                     | G1011<br>Q1019<br>G1023<br>G1028<br>G1029 |
| 4      | Rpb2     | $\beta$  | 1152-1159          | 1054-1061           | 0.68                                     | -                                         |
| 5      | Rpb1     | $\beta'$ | 1431-1433          | 1469-1471           | 0.76                                     | -                                         |

<sup>1</sup> As defined by Gnatt et al. <sup>11</sup>
